# Supplementary material for: Photoluminescence and optical nonlinearity of CdS quantum dots synthesized in a functional copolymer hydrogel template
Source: Royal Society of Chemistry journal article supplement (doi:10.1039/c6nj03665a), 2017-01-01
Supplement: c6nj03665a1.pdf [file c6nj03665a1.pdf]

## Photoluminescence and optical nonlinearity of CdS quantum dots synthesized in functional copolymer hydrogel template

*Jolly Vakayil Antony*<sup>a, b</sup>, *Jisha J Pillai*<sup>a</sup>, *Philip Kurian*<sup>a</sup>, *V P N Nampoory*<sup>c</sup>, *George Elias Kochimoolayil*<sup>a,\*</sup>

<sup>a</sup>Department of Polymer Science and Rubber Technology, Cochin University of Science and Technology, Cochin, Kerala, India, 682022

<sup>b</sup>Department of Chemistry, Maharaja's College, Ernakulam, Kerala, India, 682011

<sup>c</sup>International School of Photonics, Cochin University of Science and Technology, Cochin, Kerala, India, 682022

\*E-mail: [principal@aisat.ac.in](mailto:principal@aisat.ac.in) Phone Number : 919446447851

## 1. Preparation and Characterization of copolymer p(MMA-co-AAc)

### A) Calculation of AA content in PMMA-co-AA(25)

Molar percentage (f) of AA or carboxyl acid content in the copolymer = 100x

where 'x' is the mole fraction of AA in the copolymer.

Peak intensities are set as  $I_c = x$ ,  $I_a = 3(1-x)$

where  $I_a$  and  $I_c$  are the relative intensities of methyl protons (a) and methine proton (b) in MMA and AA respectively

$$x = \frac{3(I_c/I_a)}{1 + 3(I_c/I_a)}$$

$$f = 100x$$

$$f = 25\%$$

From the weight percentage of monomers used for copolymerization, the mole percentage of AA is 28%.

### B) Calculation of AA content in PMMA-co-AA(27).

Using the above calculation,  $f = 27\%$

From the weight percentage of monomers used for copolymerization, the mole percentage of AA is 33%

## 2 Preparation of composite p(MMA-*co*-AAc)/CdS

Photographs of the copolymer and copolymer-CdS QD composite films are given below

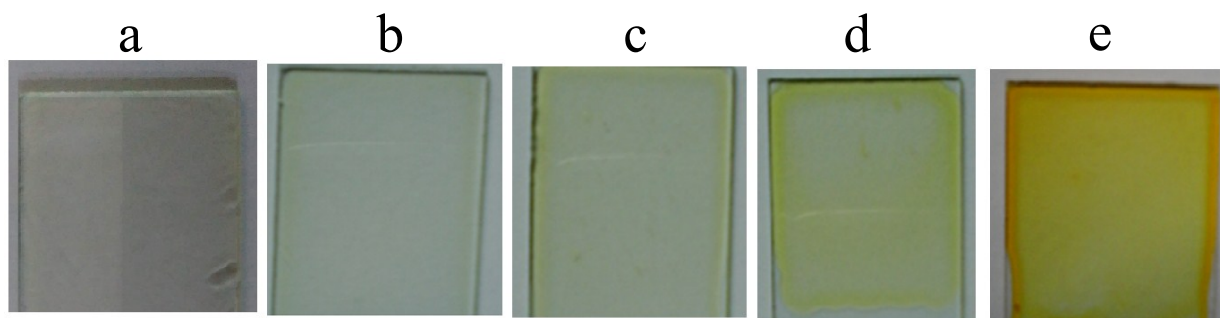

**Figure S1.** Photographs of a) p(MMA-*co*-AAc)(17) b) p(MMA-*co*-AAc)(17)/CdS, b) p(MMA-*co*-AAc)(23)/CdS, c) p(MMA-*co*-AAc)(25)/CdS, and d) p(MMA-*co*-AAc)(27)/CdS

### 3 Photoluminescence of p(MMA-co-AAc)/CdS composites

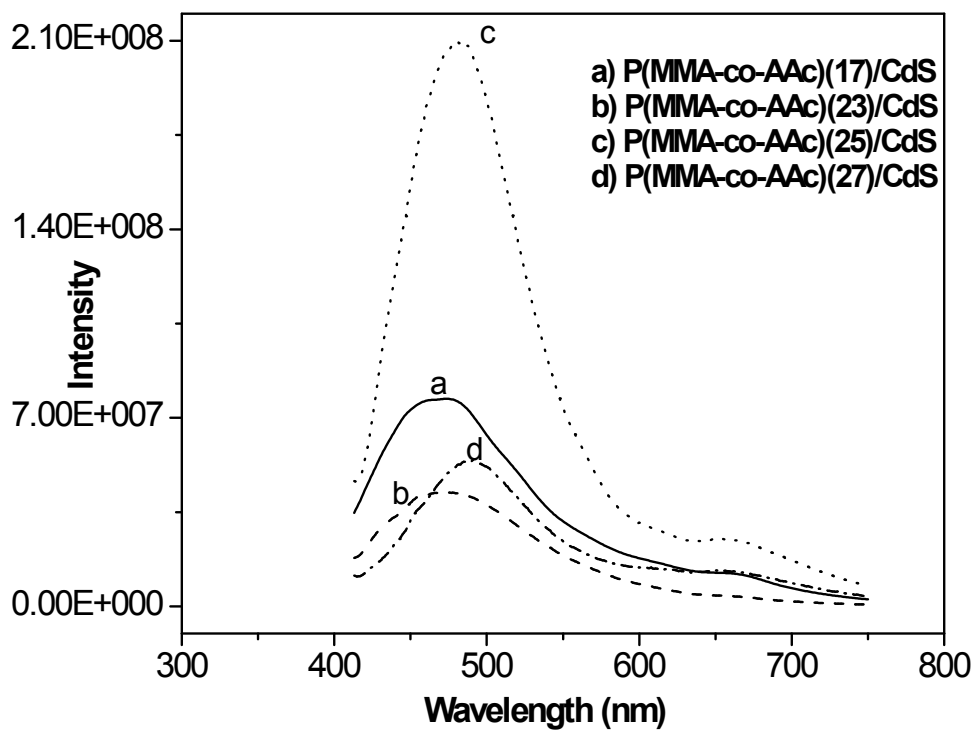

**Figure S2. PL of (a) p(MMA-co-AAc)(17)/CdS, (b) p(MMA-co-AAc)(23)/CdS (c) p(MMA-co-AAc)(25)/CdS, and (d) p(MMA-co-AAc)(27)/CdS in DMF**
